# Supplementary material
Source: PubMed Central journal article supplement (PMC3550554)
Supplement: 12298_2012_131_MOESM3_ESM.pdf [file 12298_2012_131_MOESM3_ESM.pdf]

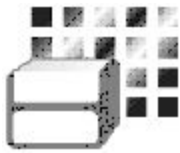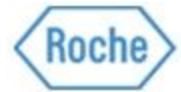

WAJIDA\_3.10

Experiment

|               |                     |                    |                     |
|---------------|---------------------|--------------------|---------------------|
| Creation Date | 11/03/2011 11:43:15 | Last Modified Date | 11/03/2011 13:12:01 |
| Operator      | System Admin        | Owner              | System Admin        |
| Start Time    | 11/03/2011 11:49:30 | End Time           | 11/03/2011 12:58:18 |
| Run State     | Completed           | Software Version   | LCS480 1.5.0.39     |
| Macro         |                     | Macro Owner        |                     |
| Macro Status  |                     |                    |                     |
| Templates     |                     | Plate ID           | 02228901            |
| Test ID       |                     | Lot ID             |                     |
| Color Comp ID |                     |                    |                     |
| Run Notes     |                     |                    |                     |

Programs

|              |               |               |      |
|--------------|---------------|---------------|------|
| Program Name | PREACTIVATION |               |      |
| Cycles       | 1             | Analysis Mode | None |

| Target (°C) | Acquisition Mode | Hold (hh:mm:ss) | Ramp Rate (°C/s) | Acquisitions (per °C) | Sec Target (°C) | Step size (°C) | Step Delay (cycles) |
|-------------|------------------|-----------------|------------------|-----------------------|-----------------|----------------|---------------------|
| 95          | None             | 00:05:00        | 4.40             |                       | 0               | 0              | 0                   |

|              |     |               |                |
|--------------|-----|---------------|----------------|
| Program Name | PCR |               |                |
| Cycles       | 40  | Analysis Mode | Quantification |

| Target (°C) | Acquisition Mode | Hold (hh:mm:ss) | Ramp Rate (°C/s) | Acquisitions (per °C) | Sec Target (°C) | Step size (°C) | Step Delay (cycles) |
|-------------|------------------|-----------------|------------------|-----------------------|-----------------|----------------|---------------------|
| 95          | None             | 00:00:20        | 4.40             |                       | 0               | 0              | 0                   |
| 56          | None             | 00:00:15        | 2.20             |                       | 0               | 0              | 0                   |
| 72          | Single           | 00:00:15        | 4.40             |                       | 0               | 0              | 0                   |

|              |               |               |                |
|--------------|---------------|---------------|----------------|
| Program Name | MELTING CURVE |               |                |
| Cycles       | 1             | Analysis Mode | Melting Curves |

| Target (°C) | Acquisition Mode | Hold (hh:mm:ss) | Ramp Rate (°C/s) | Acquisitions (per °C) | Sec Target (°C) | Step size (°C) | Step Delay (cycles) |
|-------------|------------------|-----------------|------------------|-----------------------|-----------------|----------------|---------------------|
| 95          | None             | 00:00:05        | 4.40             |                       | 0               | 0              | 0                   |
| 70          | None             | 00:01:00        | 2.20             |                       | 0               | 0              | 0                   |
| 95          | Continuous       |                 | 0.29             | 2                     | 0               | 0              | 0                   |

|              |         |               |      |
|--------------|---------|---------------|------|
| Program Name | COOLING |               |      |
| Cycles       | 1       | Analysis Mode | None |

| Target (°C) | Acquisition Mode | Hold (hh:mm:ss) | Ramp Rate (°C/s) | Acquisitions (per °C) | Sec Target (°C) | Step size (°C) | Step Delay (cycles) |
|-------------|------------------|-----------------|------------------|-----------------------|-----------------|----------------|---------------------|
|-------------|------------------|-----------------|------------------|-----------------------|-----------------|----------------|---------------------|

| Target (°C) | Acquisition Mode | Hold (hh:mm:ss) | Ramp Rate (°C/s) | Acquisitions (per °C) | Sec Target (°C) | Step size (°C) | Step Delay (cycles) |
|-------------|------------------|-----------------|------------------|-----------------------|-----------------|----------------|---------------------|
| 40          | None             | 00:00:30        | 1.50             |                       | 0               | 0              | 0                   |

### Samples

| Sample Count |           | 96          |          |              |  |  |  |
|--------------|-----------|-------------|----------|--------------|--|--|--|
| Subset       |           | All Samples |          |              |  |  |  |
| Pos          | Name      | ID          | Repl. Of | Sample Notes |  |  |  |
| A1           | Sample 1  |             |          |              |  |  |  |
| A2           | Sample 2  |             |          |              |  |  |  |
| A3           | Sample 3  |             |          |              |  |  |  |
| A4           | Sample 4  |             |          |              |  |  |  |
| A5           | Sample 5  |             |          |              |  |  |  |
| A6           | Sample 6  |             |          |              |  |  |  |
| A7           | Sample 7  |             |          |              |  |  |  |
| A8           | Sample 8  |             |          |              |  |  |  |
| A9           | Sample 9  |             |          |              |  |  |  |
| A10          | Sample 10 |             |          |              |  |  |  |
| A11          | Sample 11 |             |          |              |  |  |  |
| A12          | Sample 12 |             |          |              |  |  |  |
| B1           | Sample 13 |             |          |              |  |  |  |
| B2           | Sample 14 |             |          |              |  |  |  |
| B3           | Sample 15 |             |          |              |  |  |  |
| B4           | Sample 16 |             |          |              |  |  |  |
| B5           | Sample 17 |             |          |              |  |  |  |
| B6           | Sample 18 |             |          |              |  |  |  |
| B7           | Sample 19 |             |          |              |  |  |  |
| B8           | Sample 20 |             |          |              |  |  |  |
| B9           | Sample 21 |             |          |              |  |  |  |
| B10          | Sample 22 |             |          |              |  |  |  |
| B11          | Sample 23 |             |          |              |  |  |  |
| B12          | Sample 24 |             |          |              |  |  |  |
| C1           | Sample 25 |             |          |              |  |  |  |
| C2           | Sample 26 |             |          |              |  |  |  |
| C3           | Sample 27 |             |          |              |  |  |  |
| C4           | Sample 28 |             |          |              |  |  |  |
| C5           | Sample 29 |             |          |              |  |  |  |
| C6           | Sample 30 |             |          |              |  |  |  |
| C7           | Sample 31 |             |          |              |  |  |  |
| C8           | Sample 32 |             |          |              |  |  |  |
| C9           | Sample 33 |             |          |              |  |  |  |
| C10          | Sample 34 |             |          |              |  |  |  |
| C11          | Sample 35 |             |          |              |  |  |  |
| C12          | Sample 36 |             |          |              |  |  |  |

**Samples**

| Sample Count |           | 96          |          |              |
|--------------|-----------|-------------|----------|--------------|
| Subset       |           | All Samples |          |              |
| Pos          | Name      | ID          | Repl. Of | Sample Notes |
| D1           | Sample 37 |             |          |              |
| D2           | Sample 38 |             |          |              |
| D3           | Sample 39 |             |          |              |
| D4           | Sample 40 |             |          |              |
| D5           | Sample 41 |             |          |              |
| D6           | Sample 42 |             |          |              |
| D7           | SCARLET   |             |          |              |
| D8           | SCARLET   |             |          |              |
| D9           | ORANGE    |             |          |              |
| D10          | ORANGE    |             |          |              |
| D11          | YELLOW    |             |          |              |
| D12          | YELLOW    |             |          |              |
| E1           | Sample 49 |             |          |              |
| E2           | Sample 50 |             |          |              |
| E3           | Sample 51 |             |          |              |
| E4           | Sample 52 |             |          |              |
| E5           | Sample 53 |             |          |              |
| E6           | Sample 54 |             |          |              |
| E7           | SCARLET   |             |          |              |
| E8           | SCARLET   |             |          |              |
| E9           | ORANGE    |             |          |              |
| E10          | ORANGE    |             |          |              |
| E11          | YELLOW    |             |          |              |
| E12          | YELLOW    |             |          |              |
| F1           | Sample 61 |             |          |              |
| F2           | Sample 62 |             |          |              |
| F3           | Sample 63 |             |          |              |
| F4           | Sample 64 |             |          |              |
| F5           | Sample 65 |             |          |              |
| F6           | Sample 66 |             |          |              |
| F7           | SCARLET   |             |          |              |
| F8           | SCARLET   |             |          |              |
| F9           | ORANGE    |             |          |              |
| F10          | ORANGE    |             |          |              |
| F11          | YELLOW    |             |          |              |
| F12          | YELLOW    |             |          |              |
| G1           | Sample 73 |             |          |              |
| G2           | Sample 74 |             |          |              |
| G3           | Sample 75 |             |          |              |

## Samples

| Sample Count | 96          |    |          |              |
|--------------|-------------|----|----------|--------------|
| Subset       | All Samples |    |          |              |
| Pos          | Name        | ID | Repl. Of | Sample Notes |
| G4           | Sample 76   |    |          |              |
| G5           | Sample 77   |    |          |              |
| G6           | Sample 78   |    |          |              |
| G7           | Sample 79   |    |          |              |
| G8           | Sample 80   |    |          |              |
| G9           | Sample 81   |    |          |              |
| G10          | Sample 82   |    |          |              |
| G11          | Sample 83   |    |          |              |
| G12          | Sample 84   |    |          |              |
| H1           | Sample 85   |    |          |              |
| H2           | Sample 86   |    |          |              |
| H3           | Sample 87   |    |          |              |
| H4           | Sample 88   |    |          |              |
| H5           | Sample 89   |    |          |              |
| H6           | Sample 90   |    |          |              |
| H7           | Sample 91   |    |          |              |
| H8           | Sample 92   |    |          |              |
| H9           | Sample 93   |    |          |              |
| H10          | Sample 94   |    |          |              |
| H11          | Sample 95   |    |          |              |
| H12          | Sample 96   |    |          |              |

## Revision History

Version 10 of 10

| Revision | Date                | User  | Reason                     |
|----------|---------------------|-------|----------------------------|
| 1        | 11/03/2011 11:49:30 | admin | Created                    |
| 2        | 11/03/2011 13:00:05 | admin | GG                         |
| 3        | 11/03/2011 13:00:08 | admin | Pre-calculations complete. |
| 4        | 11/03/2011 13:02:35 | admin | VV                         |
| 5        | 11/03/2011 13:03:33 | admin | CCC                        |
| 6        | 11/03/2011 13:05:11 | admin | CCC                        |
| 7        | 11/03/2011 13:06:18 | admin | CCC                        |
| 8        | 11/03/2011 13:07:28 | admin | B                          |
| 9        | 11/03/2011 13:10:01 | admin | CCC                        |
| 10       | 11/03/2011 13:12:09 | admin | VV                         |

## Advanced Relative Quantification for ALL TODAY (Relative Quantification)

## Settings

|                              |                              |             |      |
|------------------------------|------------------------------|-------------|------|
| Program Name                 | PCR                          |             |      |
| Subset                       | ALL TODAY                    |             |      |
| AbsQuant Type                | Abs Quant/2nd Derivative Max |             |      |
| Subordinate Analysis Setting | Analyze by Target Name       | Mean/Median | Mean |
| Reference Experiment         | In-run                       |             |      |

## Target Names

| Target ID | Filter Combination | Standards/Efficiency | Efficiency Value |
|-----------|--------------------|----------------------|------------------|
| ZCD       | 465-510            | Efficiency           | 2.00             |
| LYC       | 465-510            | Efficiency           | 2.00             |
| TUBULIN   | 465-510            | Efficiency           | 2.00             |

## Pairings

|       |        |                  |           |
|-------|--------|------------------|-----------|
| Name: | D9/F11 | Pairing Setting: | AllToMean |
|-------|--------|------------------|-----------|

| Position | Sample Name | Sample Type | Target Name | Target Type | Channel |
|----------|-------------|-------------|-------------|-------------|---------|
| D9       | ORANGE      | Unknown     | ZCD         | Target      | 465-510 |
| D10      | ORANGE      | Unknown     | ZCD         | Target      | 465-510 |
| D11      | YELLOW      | Unknown     | ZCD         | Target      | 465-510 |
| D12      | YELLOW      | Unknown     | ZCD         | Target      | 465-510 |
| F11      | YELLOW      | Unknown     | TUBULIN     | Reference   | 465-510 |
| F12      | YELLOW      | Unknown     | TUBULIN     | Reference   | 465-510 |

|       |       |                  |           |
|-------|-------|------------------|-----------|
| Name: | E9/F9 | Pairing Setting: | AllToMean |
|-------|-------|------------------|-----------|

| Position | Sample Name | Sample Type | Target Name | Target Type | Channel |
|----------|-------------|-------------|-------------|-------------|---------|
| E9       | ORANGE      | Unknown     | LYC         | Target      | 465-510 |
| E10      | ORANGE      | Unknown     | LYC         | Target      | 465-510 |
| F9       | ORANGE      | Unknown     | TUBULIN     | Reference   | 465-510 |
| F10      | ORANGE      | Unknown     | TUBULIN     | Reference   | 465-510 |

|       |         |                  |           |
|-------|---------|------------------|-----------|
| Name: | E11/F11 | Pairing Setting: | AllToMean |
|-------|---------|------------------|-----------|

| Position | Sample Name | Sample Type | Target Name | Target Type | Channel |
|----------|-------------|-------------|-------------|-------------|---------|
| E11      | YELLOW      | Unknown     | LYC         | Target      | 465-510 |
| E12      | YELLOW      | Unknown     | LYC         | Target      | 465-510 |
| F11      | YELLOW      | Unknown     | TUBULIN     | Reference   | 465-510 |
| F12      | YELLOW      | Unknown     | TUBULIN     | Reference   | 465-510 |

## Results

| Bar Chart                           | Pairing | Sample Name   | Target Name |            | Tgt Cp Mean | Ref. Cp Mean | Ratios   |      | Corr/Multi Factor | Status |
|-------------------------------------|---------|---------------|-------------|------------|-------------|--------------|----------|------|-------------------|--------|
|                                     |         |               | Targets     | References |             |              | Tgt/Ref. | Norm |                   |        |
| <input checked="" type="checkbox"/> | D9/F11  | ORANGE;YELLOW | ZCD         | TUBULIN    |             |              |          |      | 1/1               |        |
| <input checked="" type="checkbox"/> | E9/F9   | ORANGE        | LYC         | TUBULIN    |             |              |          |      | 1/1               |        |

|                                     |         |        |     |         |  |  |  |  |     |
|-------------------------------------|---------|--------|-----|---------|--|--|--|--|-----|
| <input checked="" type="checkbox"/> | E11/F11 | YELLOW | LYC | TUBULIN |  |  |  |  | 1/1 |
|-------------------------------------|---------|--------|-----|---------|--|--|--|--|-----|

**Relative Quantification Results**

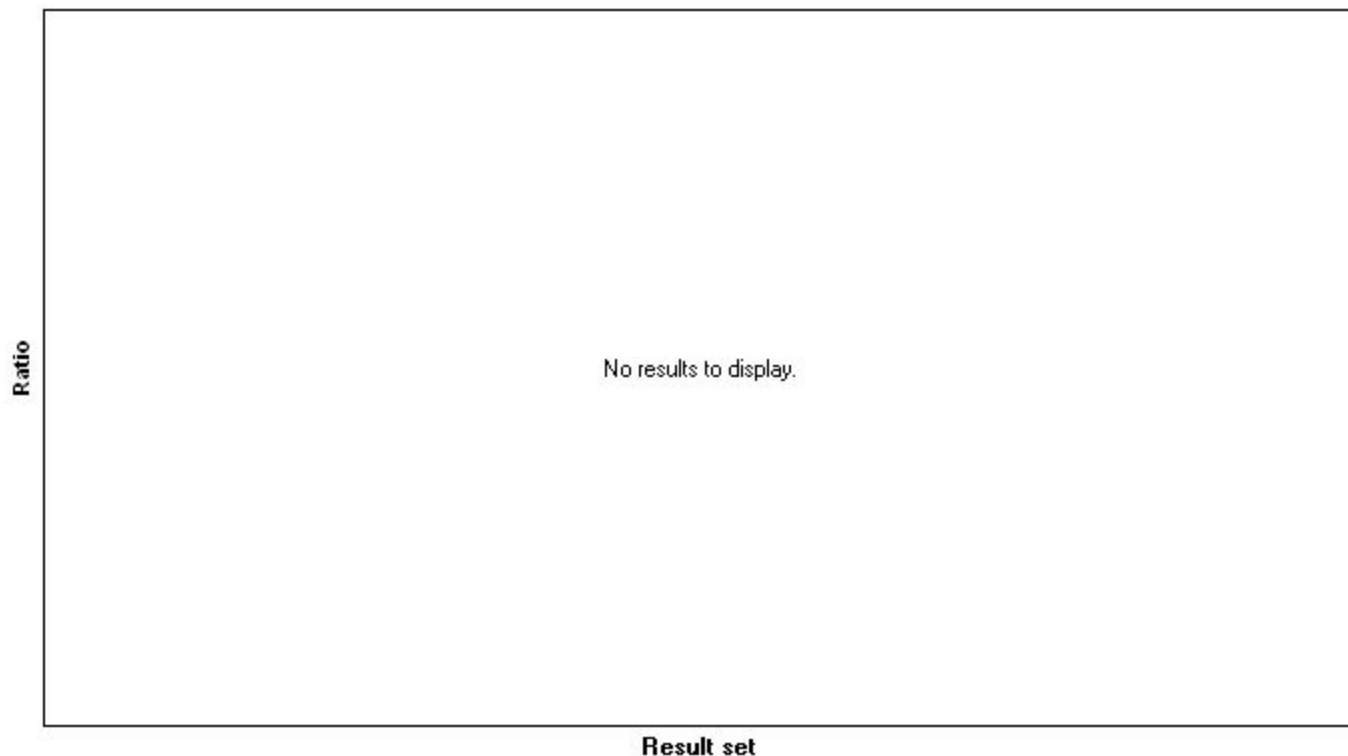

**Subordinate for ZCD\465-510\ALL TODAY (Abs Quant/2nd Derivative Max)**

**Settings**

|                    |                 |       |  |
|--------------------|-----------------|-------|--|
| Channel            | 465-510         |       |  |
| Color Compensation | Off             |       |  |
| Program            | PCR             | Units |  |
| Mode               | High Confidence |       |  |

|             |                       |
|-------------|-----------------------|
| Subset Name | ZCD\465-510\ALL TODAY |
|-------------|-----------------------|

**Results**

| Inc                                 | Pos | Name    | Type    | CP | Concentration | Standard | Status |
|-------------------------------------|-----|---------|---------|----|---------------|----------|--------|
| <input checked="" type="checkbox"/> | D7  | SCARLET | Unknown |    |               |          |        |
| <input checked="" type="checkbox"/> | D8  | SCARLET | Unknown |    |               |          |        |
| <input checked="" type="checkbox"/> | D9  | ORANGE  | Unknown |    |               |          |        |
| <input checked="" type="checkbox"/> | D10 | ORANGE  | Unknown |    |               |          |        |
| <input checked="" type="checkbox"/> | D11 | YELLOW  | Unknown |    |               |          |        |
| <input checked="" type="checkbox"/> | D12 | YELLOW  | Unknown |    |               |          |        |

### Amplification Curves

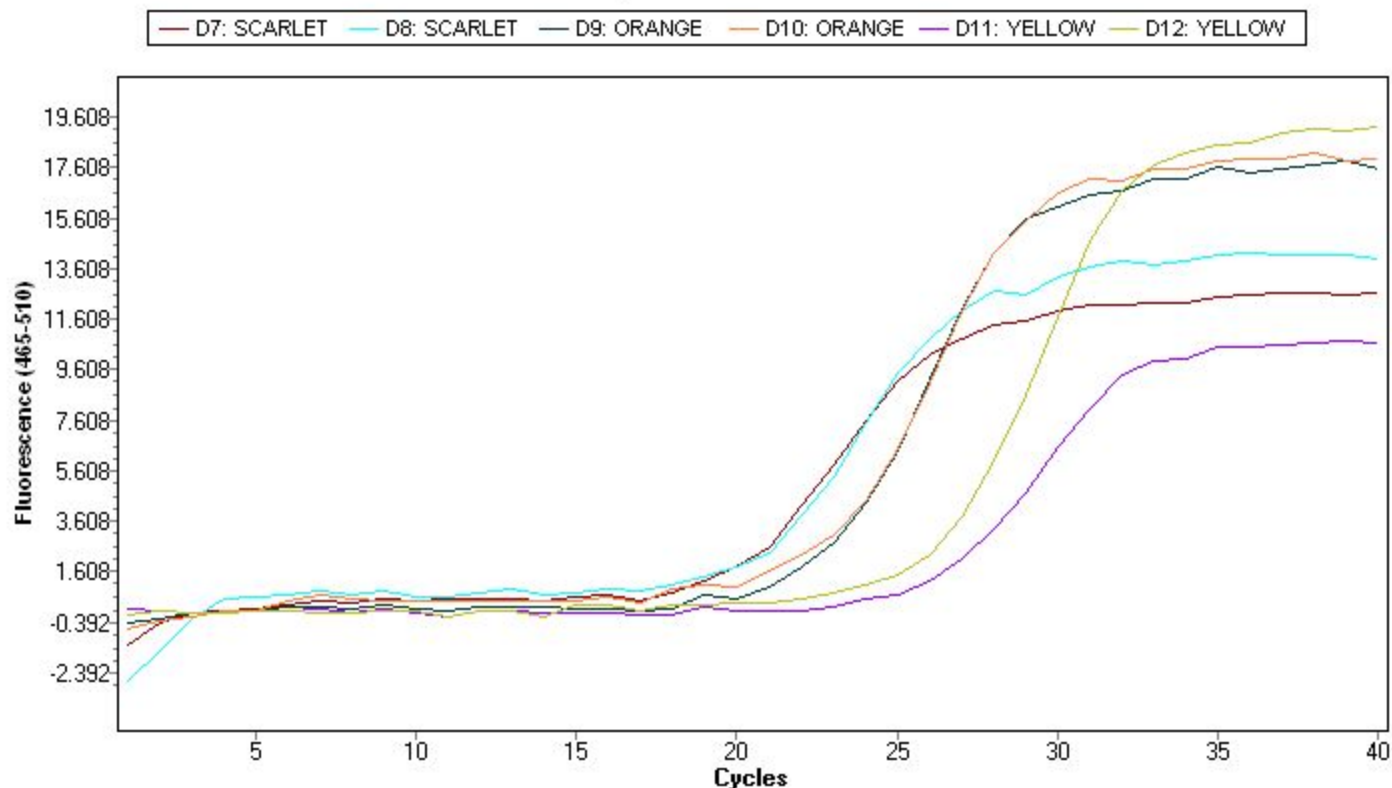

### Subordinate for LYC\465-510\ALL TODAY (Abs Quant/2nd Derivative Max)

#### Settings

|                    |                 |       |  |
|--------------------|-----------------|-------|--|
| Channel            | 465-510         |       |  |
| Color Compensation | Off             |       |  |
| Program            | PCR             | Units |  |
| Mode               | High Confidence |       |  |

|             |                       |
|-------------|-----------------------|
| Subset Name | LYC\465-510\ALL TODAY |
|-------------|-----------------------|

#### Results

| Inc                                 | Pos | Name    | Type    | CP | Concentration | Standard | Status |
|-------------------------------------|-----|---------|---------|----|---------------|----------|--------|
| <input checked="" type="checkbox"/> | E7  | SCARLET | Unknown |    |               |          |        |
| <input checked="" type="checkbox"/> | E8  | SCARLET | Unknown |    |               |          |        |
| <input checked="" type="checkbox"/> | E9  | ORANGE  | Unknown |    |               |          |        |
| <input checked="" type="checkbox"/> | E10 | ORANGE  | Unknown |    |               |          |        |
| <input checked="" type="checkbox"/> | E11 | YELLOW  | Unknown |    |               |          |        |
| <input checked="" type="checkbox"/> | E12 | YELLOW  | Unknown |    |               |          |        |

### Amplification Curves

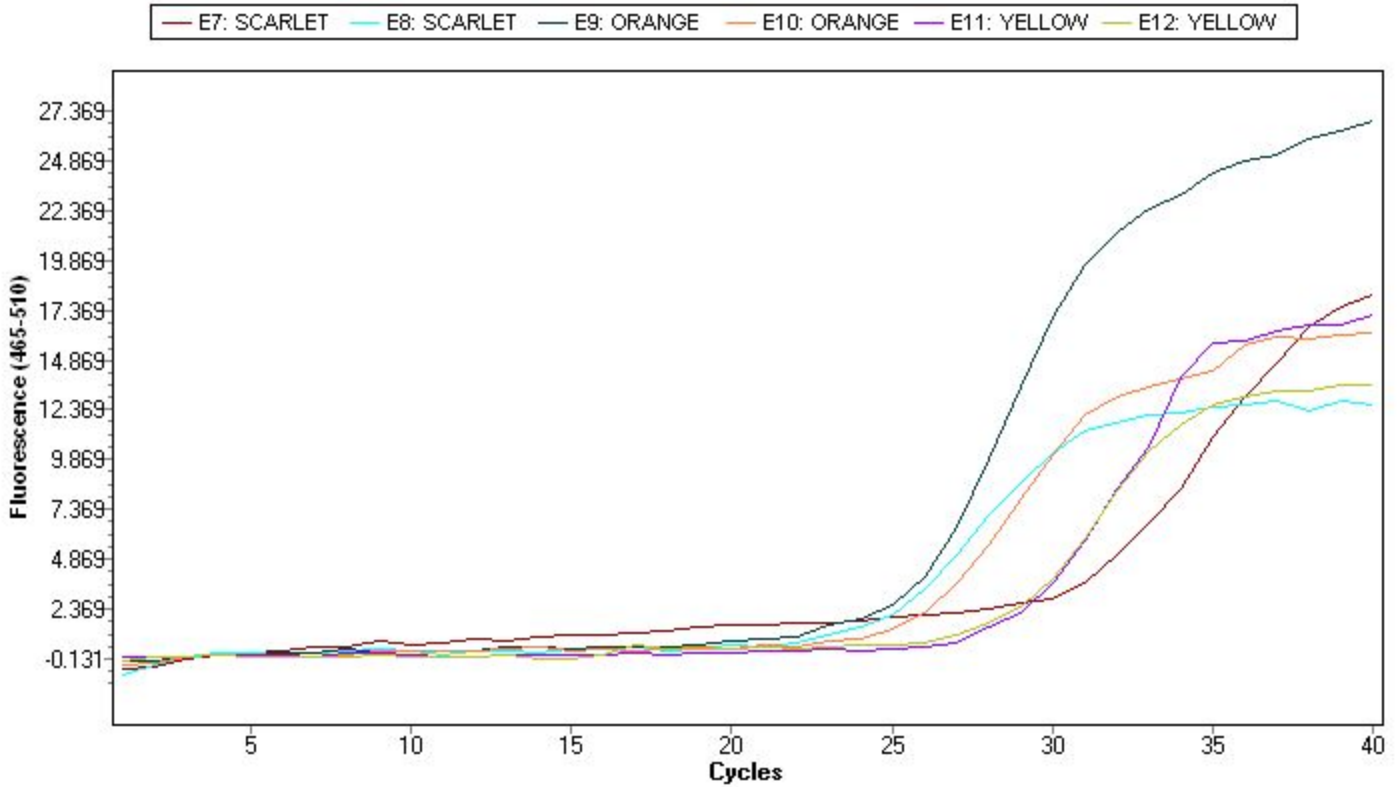

### Subordinate for TUBULIN\465-510\ALL TODAY (Abs Quant/2nd Derivative Max)

#### Settings

|                    |                 |       |  |
|--------------------|-----------------|-------|--|
| Channel            | 465-510         |       |  |
| Color Compensation | Off             |       |  |
| Program            | PCR             | Units |  |
| Mode               | High Confidence |       |  |

|             |                           |
|-------------|---------------------------|
| Subset Name | TUBULIN\465-510\ALL TODAY |
|-------------|---------------------------|

#### Results

| Inc                                 | Pos | Name    | Type    | CP    | Concentration | Standard | Status |
|-------------------------------------|-----|---------|---------|-------|---------------|----------|--------|
| <input checked="" type="checkbox"/> | F7  | SCARLET | Unknown | 21.18 |               |          |        |
| <input checked="" type="checkbox"/> | F8  | SCARLET | Unknown | 21.96 |               |          |        |
| <input checked="" type="checkbox"/> | F9  | ORANGE  | Unknown | 22.58 |               |          |        |
| <input checked="" type="checkbox"/> | F10 | ORANGE  | Unknown | 22.54 |               |          |        |
| <input checked="" type="checkbox"/> | F11 | YELLOW  | Unknown | 25.80 |               |          |        |
| <input checked="" type="checkbox"/> | F12 | YELLOW  | Unknown | 25.26 |               |          |        |



### Amplification Curves

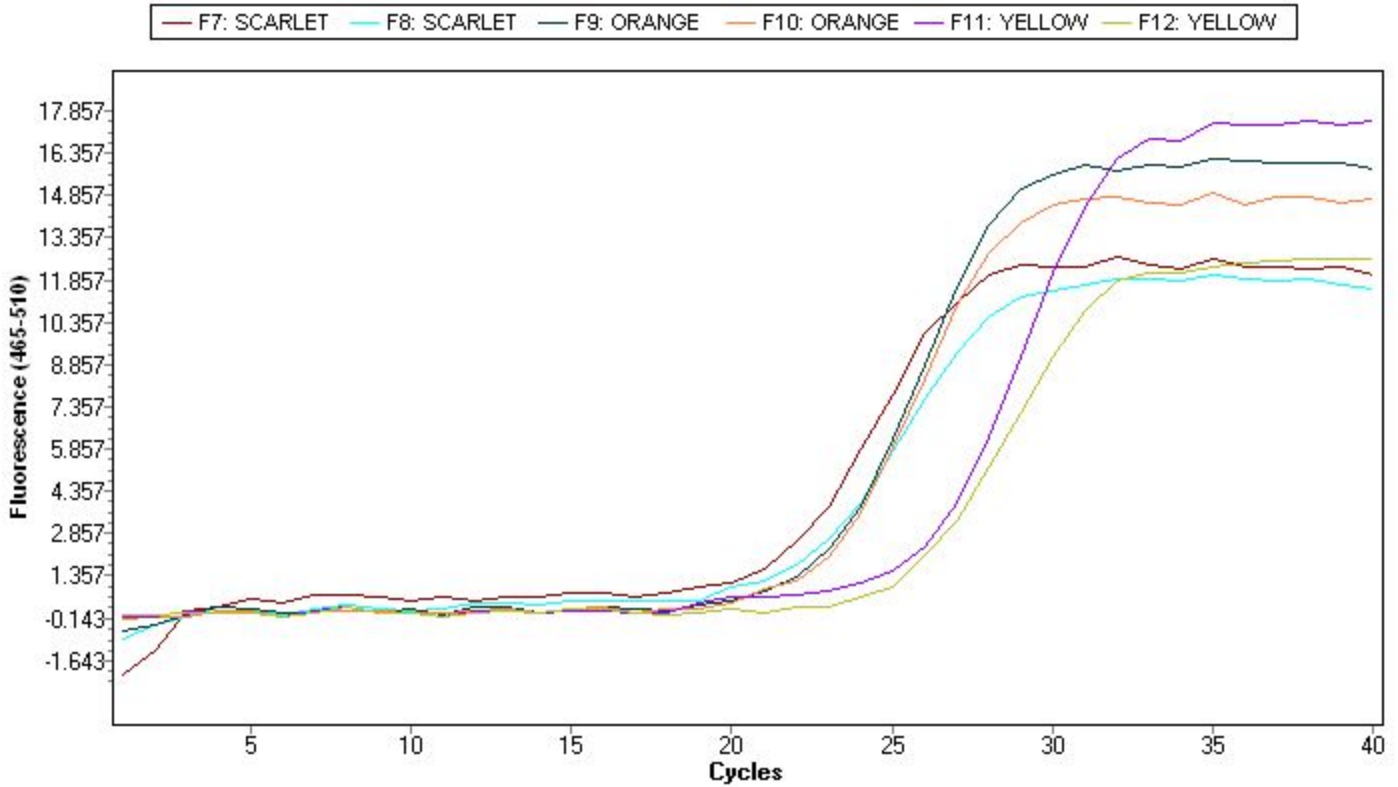

### Advanced Relative Quantification for ZCDTUB (Relative Quantification)

#### Settings

|                              |                              |             |      |
|------------------------------|------------------------------|-------------|------|
| Program Name                 | PCR                          |             |      |
| Subset                       | ZCDTUB                       |             |      |
| AbsQuant Type                | Abs Quant/2nd Derivative Max |             |      |
| Subordinate Analysis Setting | Analyze by Target Name       | Mean/Median | Mean |
| Reference Experiment         | In-run                       |             |      |

#### Target Names

| Target ID | Filter Combination | Standards/Efficiency | Efficiency Value |
|-----------|--------------------|----------------------|------------------|
| ZCD       | 465-510            | Efficiency           | 2.00             |
| TUBULIN   | 465-510            | Efficiency           | 2.00             |

#### Pairings

| Name:    | D9/F11      |             | Pairing Setting: | AllToMean   |         |  |
|----------|-------------|-------------|------------------|-------------|---------|--|
| Position | Sample Name | Sample Type | Target Name      | Target Type | Channel |  |
| D9       | ORANGE      | Unknown     | ZCD              | Target      | 465-510 |  |
| D10      | ORANGE      | Unknown     | ZCD              | Target      | 465-510 |  |
| D11      | YELLOW      | Unknown     | ZCD              | Target      | 465-510 |  |
| D12      | YELLOW      | Unknown     | ZCD              | Target      | 465-510 |  |
| F11      | YELLOW      | Unknown     | TUBULIN          | Reference   | 465-510 |  |
| F12      | YELLOW      | Unknown     | TUBULIN          | Reference   | 465-510 |  |

**Pairings**

**Results**

| Bar Chart                           | Pairing | Sample Name   | Target Name |            | Tgt Cp Mean | Ref. Cp Mean | Ratios   |      | Corr/Multi Factor | Status |
|-------------------------------------|---------|---------------|-------------|------------|-------------|--------------|----------|------|-------------------|--------|
|                                     |         |               | Targets     | References |             |              | Tgt/Ref. | Norm |                   |        |
| <input checked="" type="checkbox"/> | D9/F11  | ORANGE;YELLOW | ZCD         | TUBULIN    |             |              |          |      | 1/1               |        |

**Relative Quantification Results**

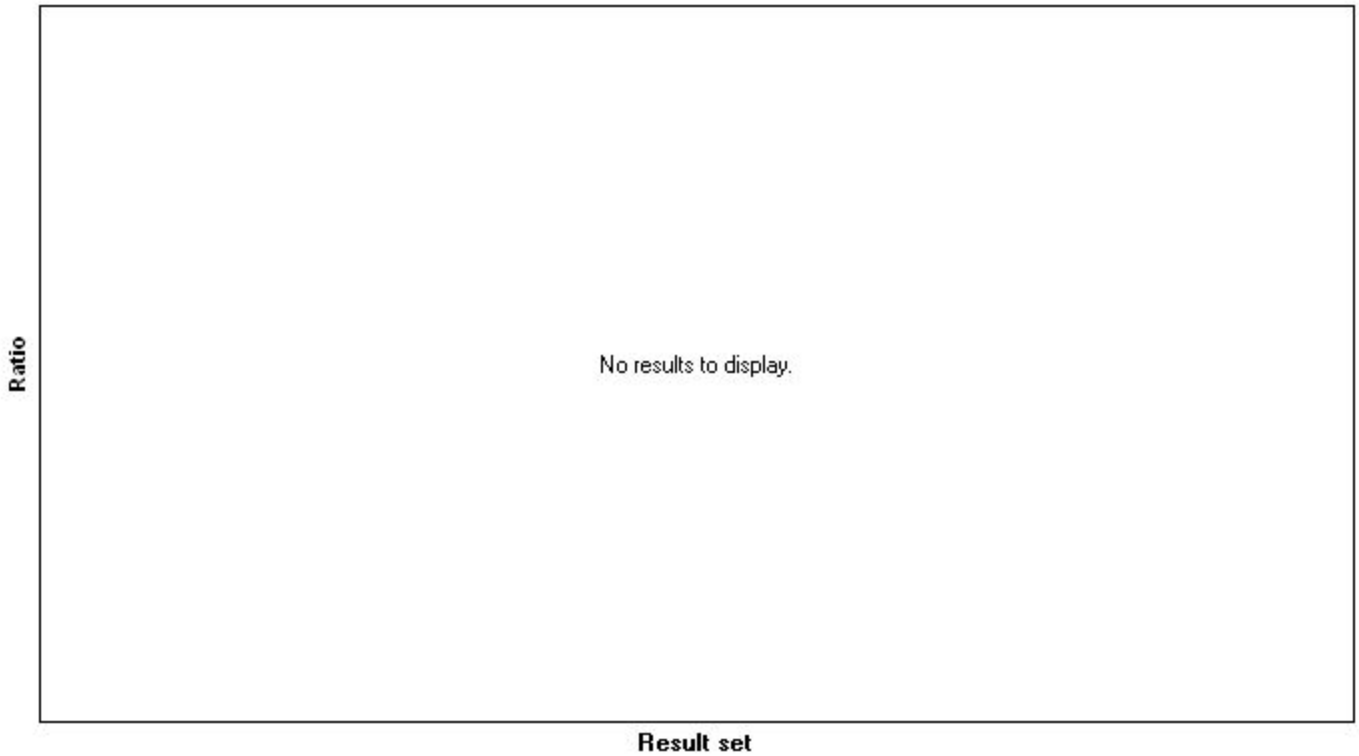

**Subordinate for ZCD\465-510\ZCDTUB (Abs Quant/2nd Derivative Max)**

**Settings**

|                    |                 |       |  |
|--------------------|-----------------|-------|--|
| Channel            | 465-510         |       |  |
| Color Compensation | Off             |       |  |
| Program            | PCR             | Units |  |
| Mode               | High Confidence |       |  |

|             |                    |
|-------------|--------------------|
| Subset Name | ZCD\465-510\ZCDTUB |
|-------------|--------------------|

**Subordinate for TUBULIN\465-510\ZCDTUB (Abs Quant/2nd Derivative Max)**

**Settings**

|                    |                 |       |  |
|--------------------|-----------------|-------|--|
| Channel            | 465-510         |       |  |
| Color Compensation | Off             |       |  |
| Program            | PCR             | Units |  |
| Mode               | High Confidence |       |  |

Subset Name TUBULIN465-510ZCDTUB

**Advanced Relative Quantification for LYCTUB (Relative Quantification)**

**Settings**

|                              |                              |             |      |
|------------------------------|------------------------------|-------------|------|
| Program Name                 | PCR                          |             |      |
| Subset                       | LYCTUB                       |             |      |
| AbsQuant Type                | Abs Quant/2nd Derivative Max |             |      |
| Subordinate Analysis Setting | Analyze by Target Name       | Mean/Median | Mean |
| Reference Experiment         | In-run                       |             |      |

**Target Names**

| Target ID | Filter Combination | Standards/Efficiency | Efficiency Value |
|-----------|--------------------|----------------------|------------------|
| LYC       | 465-510            | Efficiency           | 2.00             |
| TUBULIN   | 465-510            | Efficiency           | 2.00             |

**Pairings**

Name: E9/F9      Pairing Setting: AllToMean

| Position | Sample Name | Sample Type | Target Name | Target Type | Channel |
|----------|-------------|-------------|-------------|-------------|---------|
| E9       | ORANGE      | Unknown     | LYC         | Target      | 465-510 |
| E10      | ORANGE      | Unknown     | LYC         | Target      | 465-510 |
| F9       | ORANGE      | Unknown     | TUBULIN     | Reference   | 465-510 |
| F10      | ORANGE      | Unknown     | TUBULIN     | Reference   | 465-510 |

Name: E11/F11      Pairing Setting: AllToMean

| Position | Sample Name | Sample Type | Target Name | Target Type | Channel |
|----------|-------------|-------------|-------------|-------------|---------|
| E11      | YELLOW      | Unknown     | LYC         | Target      | 465-510 |
| E12      | YELLOW      | Unknown     | LYC         | Target      | 465-510 |
| F11      | YELLOW      | Unknown     | TUBULIN     | Reference   | 465-510 |
| F12      | YELLOW      | Unknown     | TUBULIN     | Reference   | 465-510 |

**Results**

| Bar Chart                           | Pairing | Sample Name | Target Name |            | Tgt Cp Mean | Ref. Cp Mean | Ratios   |      | Corr/Multi Factor | Status |
|-------------------------------------|---------|-------------|-------------|------------|-------------|--------------|----------|------|-------------------|--------|
|                                     |         |             | Targets     | References |             |              | Tgt/Ref. | Norm |                   |        |
| <input checked="" type="checkbox"/> | E9/F9   | ORANGE      | LYC         | TUBULIN    |             |              |          |      | 1/1               |        |
| <input checked="" type="checkbox"/> | E11/F11 | YELLOW      | LYC         | TUBULIN    |             |              |          |      | 1/1               |        |

### Relative Quantification Results

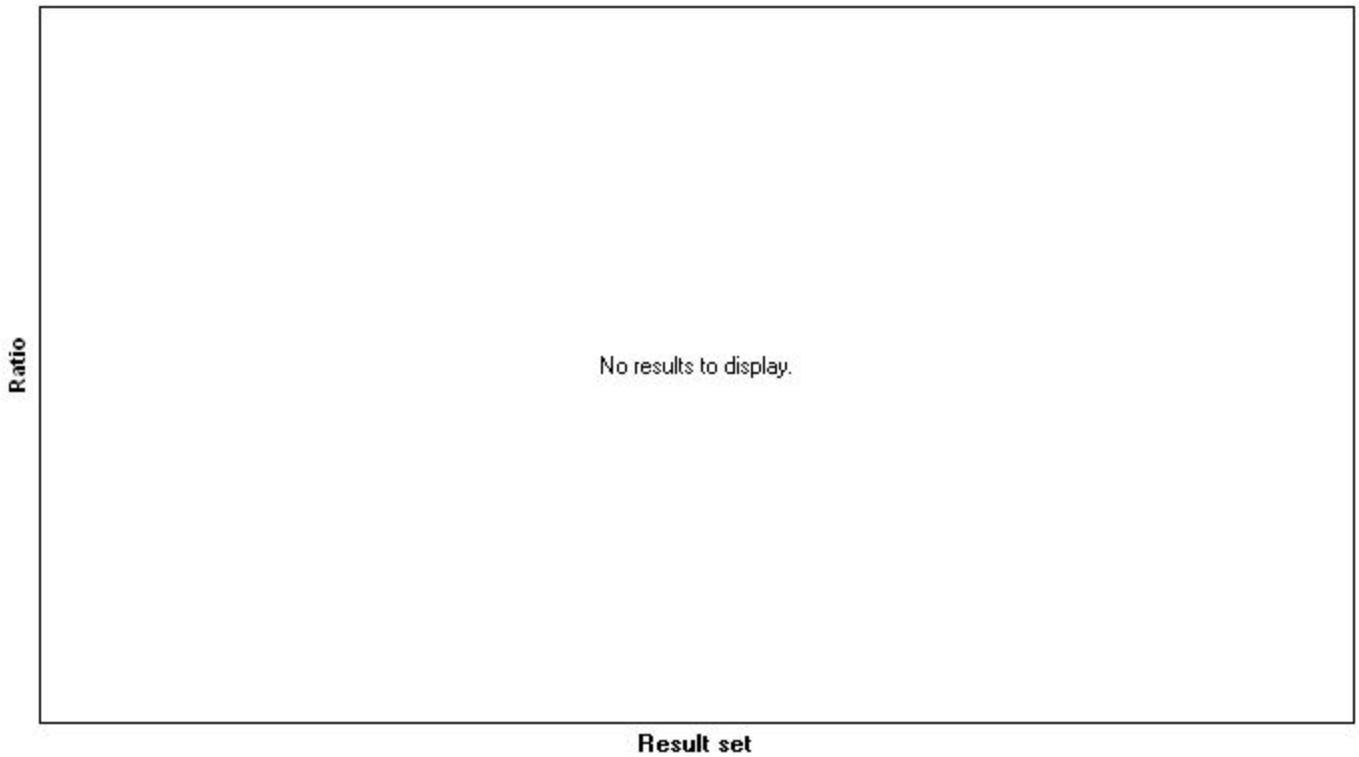

#### Subordinate for LYC\465-510\LYCTUB (Abs Quant/2nd Derivative Max)

##### Settings

|                    |                 |       |
|--------------------|-----------------|-------|
| Channel            | 465-510         |       |
| Color Compensation | Off             |       |
| Program            | PCR             | Units |
| Mode               | High Confidence |       |

|             |                    |
|-------------|--------------------|
| Subset Name | LYC\465-510\LYCTUB |
|-------------|--------------------|

#### Subordinate for TUBULIN\465-510\LYCTUB (Abs Quant/2nd Derivative Max)

##### Settings

|                    |                 |       |
|--------------------|-----------------|-------|
| Channel            | 465-510         |       |
| Color Compensation | Off             |       |
| Program            | PCR             | Units |
| Mode               | High Confidence |       |

|             |                        |
|-------------|------------------------|
| Subset Name | TUBULIN\465-510\LYCTUB |
|-------------|------------------------|

#### Advanced Relative Quantification for ZCDTUB (1) (Relative Quantification)

**Settings**

|                              |                              |             |      |
|------------------------------|------------------------------|-------------|------|
| Program Name                 | PCR                          |             |      |
| Subset                       | ZCDTUB                       |             |      |
| AbsQuant Type                | Abs Quant/2nd Derivative Max |             |      |
| Subordinate Analysis Setting | Analyze by Target Name       | Mean/Median | Mean |
| Reference Experiment         | In-run                       |             |      |

**Target Names**

| Target ID | Filter Combination | Standards/Efficiency | Efficiency Value |
|-----------|--------------------|----------------------|------------------|
| ZCD       | 465-510            | Efficiency           | 2.00             |
| TUBULIN   | 465-510            | Efficiency           | 2.00             |

**Pairings**

| Name:    | D7/F7       |             | Pairing Setting: | AllToMean   |         |  |
|----------|-------------|-------------|------------------|-------------|---------|--|
| Position | Sample Name | Sample Type | Target Name      | Target Type | Channel |  |
| D7       | SCARLET     | Unknown     | ZCD              | Target      | 465-510 |  |
| D8       | SCARLET     | Unknown     | ZCD              | Target      | 465-510 |  |
| F7       | SCARLET     | Unknown     | TUBULIN          | Reference   | 465-510 |  |
| F8       | SCARLET     | Unknown     | TUBULIN          | Reference   | 465-510 |  |

| Name:    | D9/F11      |             | Pairing Setting: | AllToMean   |         |  |
|----------|-------------|-------------|------------------|-------------|---------|--|
| Position | Sample Name | Sample Type | Target Name      | Target Type | Channel |  |
| D9       | ORANGE      | Unknown     | ZCD              | Target      | 465-510 |  |
| D10      | ORANGE      | Unknown     | ZCD              | Target      | 465-510 |  |
| D11      | YELLOW      | Unknown     | ZCD              | Target      | 465-510 |  |
| D12      | YELLOW      | Unknown     | ZCD              | Target      | 465-510 |  |
| F11      | YELLOW      | Unknown     | TUBULIN          | Reference   | 465-510 |  |
| F12      | YELLOW      | Unknown     | TUBULIN          | Reference   | 465-510 |  |

**Results**

| Bar Chart                           | Pairing | Sample Name   | Target Name |            | Tgt Cp Mean | Ref. Cp Mean | Ratios   |      | Corr/Multi Factor | Status |
|-------------------------------------|---------|---------------|-------------|------------|-------------|--------------|----------|------|-------------------|--------|
|                                     |         |               | Targets     | References |             |              | Tgt/Ref. | Norm |                   |        |
| <input checked="" type="checkbox"/> | D7/F7   | SCARLET       | ZCD         | TUBULIN    | 20.14       | 21.57        | 2.697    |      | 1/1               |        |
| <input checked="" type="checkbox"/> | D9/F11  | ORANGE;YELLOW | ZCD         | TUBULIN    | 24.38       | 25.53        | 2.214    |      | 1/1               |        |

**Relative Quantification Results**

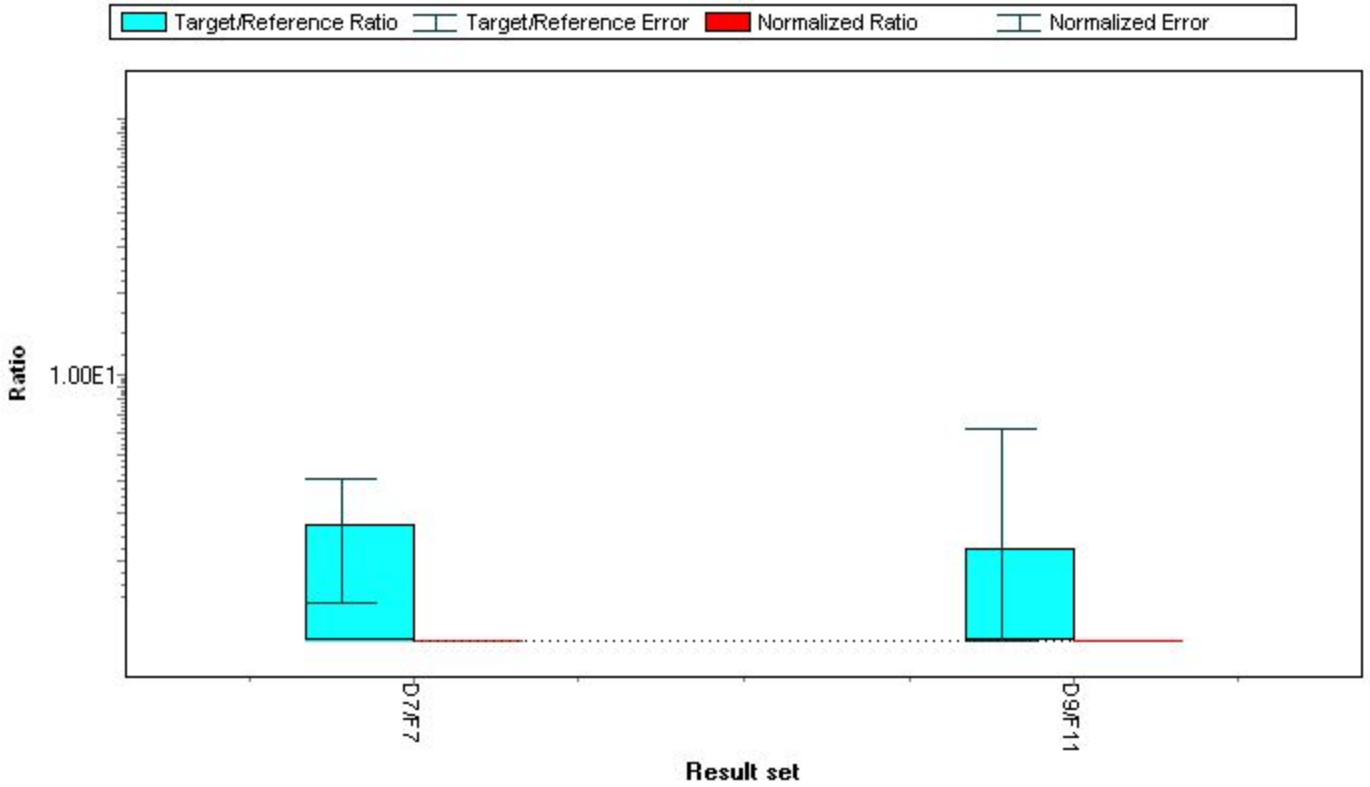

**Subordinate for ZCD\465-510\ZCDTUB (Abs Quant/2nd Derivative Max)**

**Settings**

|                    |                   |       |  |
|--------------------|-------------------|-------|--|
| Channel            | 465-510           |       |  |
| Color Compensation | Off               |       |  |
| Program            | PCR               | Units |  |
| Mode               | High Confidence   |       |  |
| Subset Name        | ZCD465-510\ZCDTUB |       |  |

**Subordinate for TUBULIN\465-510\ZCDTUB (Abs Quant/2nd Derivative Max)**

**Settings**

|                    |                       |       |  |
|--------------------|-----------------------|-------|--|
| Channel            | 465-510               |       |  |
| Color Compensation | Off                   |       |  |
| Program            | PCR                   | Units |  |
| Mode               | High Confidence       |       |  |
| Subset Name        | TUBULIN465-510\ZCDTUB |       |  |

**Advanced Relative Quantification for LYCTUB (1) (Relative Quantification)**

## Settings

|                              |                              |             |      |
|------------------------------|------------------------------|-------------|------|
| Program Name                 | PCR                          |             |      |
| Subset                       | LYCTUB                       |             |      |
| AbsQuant Type                | Abs Quant/2nd Derivative Max |             |      |
| Subordinate Analysis Setting | Analyze by Target Name       | Mean/Median | Mean |
| Reference Experiment         | In-run                       |             |      |

## Target Names

| Target ID | Filter Combination | Standards/Efficiency | Efficiency Value |
|-----------|--------------------|----------------------|------------------|
| LYC       | 465-510            | Efficiency           | 2.00             |
| TUBULIN   | 465-510            | Efficiency           | 2.00             |

## Pairings

| Name:    | E7/F7       |             | Pairing Setting: | AllToMean   |         |  |
|----------|-------------|-------------|------------------|-------------|---------|--|
| Position | Sample Name | Sample Type | Target Name      | Target Type | Channel |  |
| E7       | SCARLET     | Unknown     | LYC              | Target      | 465-510 |  |
| E8       | SCARLET     | Unknown     | LYC              | Target      | 465-510 |  |
| F7       | SCARLET     | Unknown     | TUBULIN          | Reference   | 465-510 |  |
| F8       | SCARLET     | Unknown     | TUBULIN          | Reference   | 465-510 |  |

| Name:    | E9/F9       |             | Pairing Setting: | AllToMean   |         |  |
|----------|-------------|-------------|------------------|-------------|---------|--|
| Position | Sample Name | Sample Type | Target Name      | Target Type | Channel |  |
| E9       | ORANGE      | Unknown     | LYC              | Target      | 465-510 |  |
| E10      | ORANGE      | Unknown     | LYC              | Target      | 465-510 |  |
| F9       | ORANGE      | Unknown     | TUBULIN          | Reference   | 465-510 |  |
| F10      | ORANGE      | Unknown     | TUBULIN          | Reference   | 465-510 |  |

| Name:    | E11/F11     |             | Pairing Setting: | AllToMean   |         |  |
|----------|-------------|-------------|------------------|-------------|---------|--|
| Position | Sample Name | Sample Type | Target Name      | Target Type | Channel |  |
| E11      | YELLOW      | Unknown     | LYC              | Target      | 465-510 |  |
| E12      | YELLOW      | Unknown     | LYC              | Target      | 465-510 |  |
| F11      | YELLOW      | Unknown     | TUBULIN          | Reference   | 465-510 |  |
| F12      | YELLOW      | Unknown     | TUBULIN          | Reference   | 465-510 |  |

## Results

| Bar Chart                           | Pairing | Sample Name | Target Name |            | Tgt Cp | Ref. Cp | Ratios   |      | Corr/Multi Factor | Status |
|-------------------------------------|---------|-------------|-------------|------------|--------|---------|----------|------|-------------------|--------|
|                                     |         |             | Targets     | References |        |         | Tgt/Ref. | Norm |                   |        |
| <input checked="" type="checkbox"/> | E7/F7   | SCARLET     | LYC         | TUBULIN    | 27.78  | 21.57   | 1.35E-2  |      | 1/1               |        |
| <input checked="" type="checkbox"/> | E9/F9   | ORANGE      | LYC         | TUBULIN    | 25.47  | 22.56   | 0.1332   |      | 1/1               |        |
| <input checked="" type="checkbox"/> | E11/F11 | YELLOW      | LYC         | TUBULIN    | 28.55  | 25.53   | 0.1234   |      | 1/1               |        |

**Relative Quantification Results**

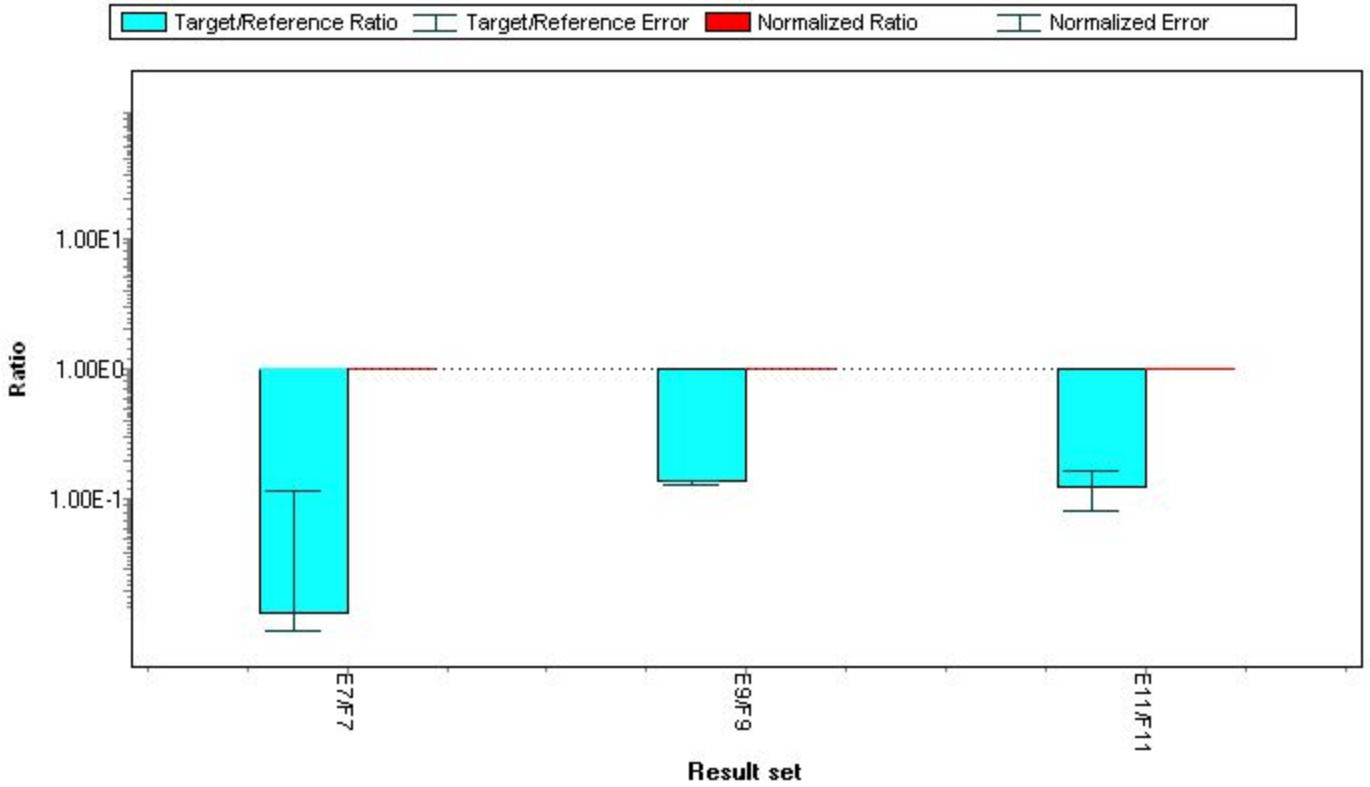

**Subordinate for LYC\465-510\LYCTUB (Abs Quant/2nd Derivative Max)**

**Settings**

|                    |                 |
|--------------------|-----------------|
| Channel            | 465-510         |
| Color Compensation | Off             |
| Program            | PCR             |
| Mode               | High Confidence |

|             |                    |
|-------------|--------------------|
| Subset Name | LYC\465-510\LYCTUB |
|-------------|--------------------|

**Subordinate for TUBULIN\465-510\LYCTUB (Abs Quant/2nd Derivative Max)**

**Settings**

|                    |                 |
|--------------------|-----------------|
| Channel            | 465-510         |
| Color Compensation | Off             |
| Program            | PCR             |
| Mode               | High Confidence |

|             |                        |
|-------------|------------------------|
| Subset Name | TUBULIN\465-510\LYCTUB |
|-------------|------------------------|

**Advanced Relative Quantification for ALL TODAY (1) (Relative Quantification)**



## Settings

|                              |                              |             |      |
|------------------------------|------------------------------|-------------|------|
| Program Name                 | PCR                          |             |      |
| Subset                       | ALL TODAY                    |             |      |
| AbsQuant Type                | Abs Quant/2nd Derivative Max |             |      |
| Subordinate Analysis Setting | Analyze by Target Name       | Mean/Median | Mean |
| Reference Experiment         | In-run                       |             |      |

## Target Names

| Target ID | Filter Combination | Standards/Efficiency | Efficiency Value |
|-----------|--------------------|----------------------|------------------|
| ZCD       | 465-510            | Efficiency           | 2.00             |
| LYC       | 465-510            | Efficiency           | 2.00             |
| TUBULIN   | 465-510            | Efficiency           | 2.00             |

## Pairings

| Name:    | D7/F7       |             | Pairing Setting: | AllToMean   |         |  |
|----------|-------------|-------------|------------------|-------------|---------|--|
| Position | Sample Name | Sample Type | Target Name      | Target Type | Channel |  |
| D7       | SCARLET     | Unknown     | ZCD              | Target      | 465-510 |  |
| D8       | SCARLET     | Unknown     | ZCD              | Target      | 465-510 |  |
| F7       | SCARLET     | Unknown     | TUBULIN          | Reference   | 465-510 |  |
| F8       | SCARLET     | Unknown     | TUBULIN          | Reference   | 465-510 |  |

| Name:    | D9/F11      |             | Pairing Setting: | AllToMean   |         |  |
|----------|-------------|-------------|------------------|-------------|---------|--|
| Position | Sample Name | Sample Type | Target Name      | Target Type | Channel |  |
| D9       | ORANGE      | Unknown     | ZCD              | Target      | 465-510 |  |
| D10      | ORANGE      | Unknown     | ZCD              | Target      | 465-510 |  |
| D11      | YELLOW      | Unknown     | ZCD              | Target      | 465-510 |  |
| D12      | YELLOW      | Unknown     | ZCD              | Target      | 465-510 |  |
| F11      | YELLOW      | Unknown     | TUBULIN          | Reference   | 465-510 |  |
| F12      | YELLOW      | Unknown     | TUBULIN          | Reference   | 465-510 |  |

| Name:    | E7/F7       |             | Pairing Setting: | AllToMean   |         |  |
|----------|-------------|-------------|------------------|-------------|---------|--|
| Position | Sample Name | Sample Type | Target Name      | Target Type | Channel |  |
| E7       | SCARLET     | Unknown     | LYC              | Target      | 465-510 |  |
| E8       | SCARLET     | Unknown     | LYC              | Target      | 465-510 |  |
| F7       | SCARLET     | Unknown     | TUBULIN          | Reference   | 465-510 |  |
| F8       | SCARLET     | Unknown     | TUBULIN          | Reference   | 465-510 |  |

| Name:    | E9/F9       |             | Pairing Setting: | AllToMean   |         |  |
|----------|-------------|-------------|------------------|-------------|---------|--|
| Position | Sample Name | Sample Type | Target Name      | Target Type | Channel |  |

**Pairings**

|     |        |         |         |           |         |
|-----|--------|---------|---------|-----------|---------|
| E9  | ORANGE | Unknown | LYC     | Target    | 465-510 |
| E10 | ORANGE | Unknown | LYC     | Target    | 465-510 |
| F9  | ORANGE | Unknown | TUBULIN | Reference | 465-510 |
| F10 | ORANGE | Unknown | TUBULIN | Reference | 465-510 |

Name: E11/F11      Pairing Setting: AllToMean

| Position | Sample Name | Sample Type | Target Name | Target Type | Channel |
|----------|-------------|-------------|-------------|-------------|---------|
| E11      | YELLOW      | Unknown     | LYC         | Target      | 465-510 |
| E12      | YELLOW      | Unknown     | LYC         | Target      | 465-510 |
| F11      | YELLOW      | Unknown     | TUBULIN     | Reference   | 465-510 |
| F12      | YELLOW      | Unknown     | TUBULIN     | Reference   | 465-510 |

**Results**

| Bar Chart                           | Pairing | Sample Name   | Target Name |            | Tgt Cp Mean | Ref. Cp Mean | Ratios   |      | Corr/Multi Factor | Status |
|-------------------------------------|---------|---------------|-------------|------------|-------------|--------------|----------|------|-------------------|--------|
|                                     |         |               | Targets     | References |             |              | Tgt/Ref. | Norm |                   |        |
| <input checked="" type="checkbox"/> | D7/F7   | SCARLET       | ZCD         | TUBULIN    | 20.14       | 21.57        | 2.697    |      | 1/1               |        |
| <input checked="" type="checkbox"/> | D9/F11  | ORANGE;YELLOW | ZCD         | TUBULIN    | 24.38       | 25.53        | 2.214    |      | 1/1               |        |
| <input checked="" type="checkbox"/> | E7/F7   | SCARLET       | LYC         | TUBULIN    | 27.78       | 21.57        | 1.35E-2  |      | 1/1               |        |
| <input checked="" type="checkbox"/> | E9/F9   | ORANGE        | LYC         | TUBULIN    | 25.47       | 22.56        | 0.1332   |      | 1/1               |        |
| <input checked="" type="checkbox"/> | E11/F11 | YELLOW        | LYC         | TUBULIN    | 28.55       | 25.53        | 0.1234   |      | 1/1               |        |

**Relative Quantification Results**

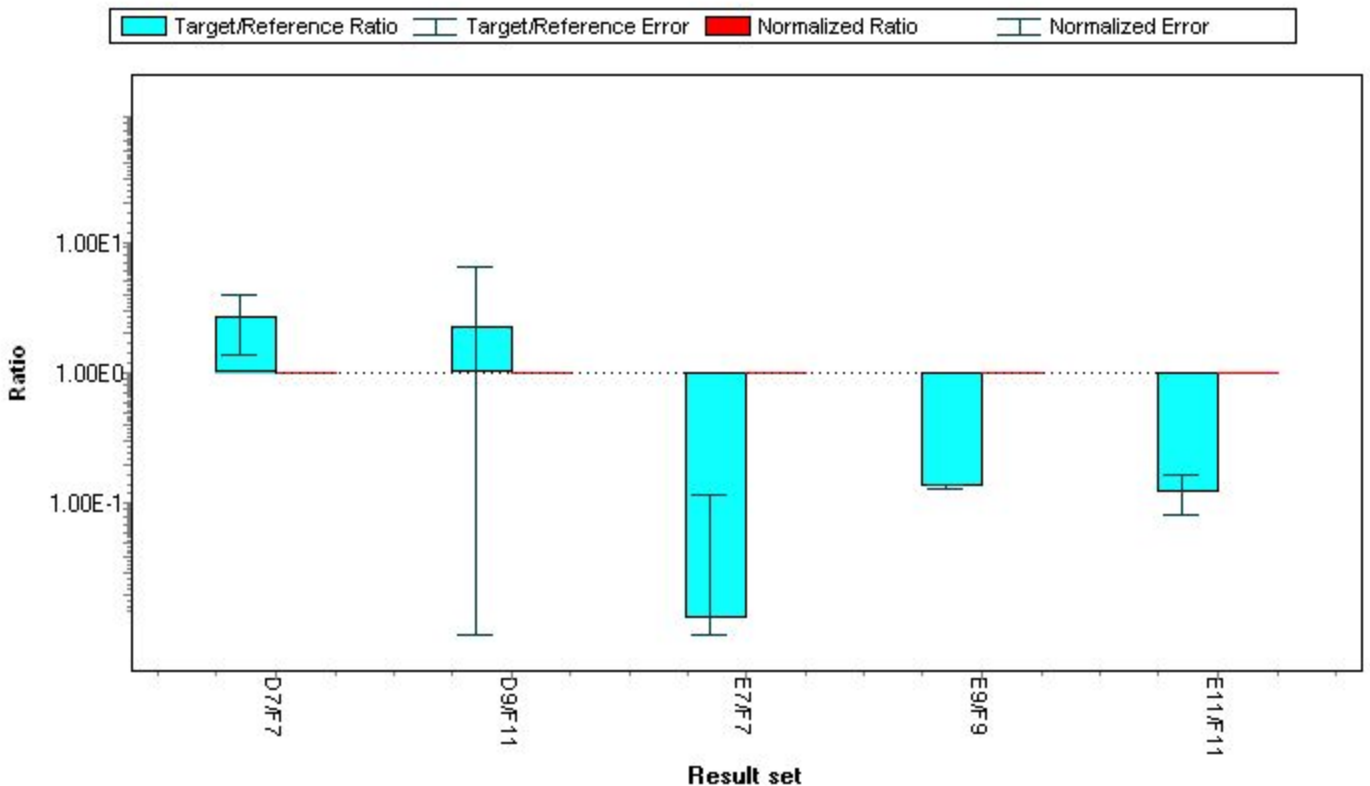

**Subordinate for ZCD\465-510\ALL TODAY (Abs Quant/2nd Derivative Max)**

**Settings**

|                    |                 |       |  |
|--------------------|-----------------|-------|--|
| Channel            | 465-510         |       |  |
| Color Compensation | Off             |       |  |
| Program            | PCR             | Units |  |
| Mode               | High Confidence |       |  |

|             |                       |  |  |
|-------------|-----------------------|--|--|
| Subset Name | ZCD\465-510\ALL TODAY |  |  |
|-------------|-----------------------|--|--|

**Subordinate for LYC\465-510\ALL TODAY (Abs Quant/2nd Derivative Max)****Settings**

|                    |                 |       |  |
|--------------------|-----------------|-------|--|
| Channel            | 465-510         |       |  |
| Color Compensation | Off             |       |  |
| Program            | PCR             | Units |  |
| Mode               | High Confidence |       |  |

|             |                       |  |  |
|-------------|-----------------------|--|--|
| Subset Name | LYC\465-510\ALL TODAY |  |  |
|-------------|-----------------------|--|--|

**Subordinate for TUBULIN\465-510\ALL TODAY (Abs Quant/2nd Derivative Max)****Settings**

|                    |                 |       |  |
|--------------------|-----------------|-------|--|
| Channel            | 465-510         |       |  |
| Color Compensation | Off             |       |  |
| Program            | PCR             | Units |  |
| Mode               | High Confidence |       |  |

|             |                           |  |  |
|-------------|---------------------------|--|--|
| Subset Name | TUBULIN\465-510\ALL TODAY |  |  |
|-------------|---------------------------|--|--|

**Advanced Relative Quantification for ALL TODAY (2) (Relative Quantification)****Settings**

|                              |                              |             |      |
|------------------------------|------------------------------|-------------|------|
| Program Name                 | PCR                          |             |      |
| Subset                       | ALL TODAY                    |             |      |
| AbsQuant Type                | Abs Quant/2nd Derivative Max |             |      |
| Subordinate Analysis Setting | Analyze by Target Name       | Mean/Median | Mean |
| Reference Experiment         | In-run                       |             |      |

**Target Names**

| Target ID | Filter Combination | Standards/Efficiency | Efficiency Value |
|-----------|--------------------|----------------------|------------------|
| ZCD       | 465-510            | Efficiency           | 2.00             |
| LYC       | 465-510            | Efficiency           | 2.00             |
| TUBULIN   | 465-510            | Efficiency           | 2.00             |

**Pairings**

|          |             |             |                  |             |         |  |
|----------|-------------|-------------|------------------|-------------|---------|--|
| Name:    | D7/F7       |             | Pairing Setting: | AllToMean   |         |  |
| Position | Sample Name | Sample Type | Target Name      | Target Type | Channel |  |

## Pairings

|    |         |         |         |           |         |
|----|---------|---------|---------|-----------|---------|
| D7 | SCARLET | Unknown | ZCD     | Target    | 465-510 |
| D8 | SCARLET | Unknown | ZCD     | Target    | 465-510 |
| F7 | SCARLET | Unknown | TUBULIN | Reference | 465-510 |
| F8 | SCARLET | Unknown | TUBULIN | Reference | 465-510 |

| Name: D9/F9 |             |             | Pairing Setting: AllToMean |             |         |
|-------------|-------------|-------------|----------------------------|-------------|---------|
| Position    | Sample Name | Sample Type | Target Name                | Target Type | Channel |
| D9          | ORANGE      | Unknown     | ZCD                        | Target      | 465-510 |
| D10         | ORANGE      | Unknown     | ZCD                        | Target      | 465-510 |
| F9          | ORANGE      | Unknown     | TUBULIN                    | Reference   | 465-510 |
| F10         | ORANGE      | Unknown     | TUBULIN                    | Reference   | 465-510 |

| Name: D11/F11 |             |             | Pairing Setting: AllToMean |             |         |
|---------------|-------------|-------------|----------------------------|-------------|---------|
| Position      | Sample Name | Sample Type | Target Name                | Target Type | Channel |
| D11           | YELLOW      | Unknown     | ZCD                        | Target      | 465-510 |
| D12           | YELLOW      | Unknown     | ZCD                        | Target      | 465-510 |
| F11           | YELLOW      | Unknown     | TUBULIN                    | Reference   | 465-510 |
| F12           | YELLOW      | Unknown     | TUBULIN                    | Reference   | 465-510 |

| Name: E7/F7 |             |             | Pairing Setting: AllToMean |             |         |
|-------------|-------------|-------------|----------------------------|-------------|---------|
| Position    | Sample Name | Sample Type | Target Name                | Target Type | Channel |
| E7          | SCARLET     | Unknown     | LYC                        | Target      | 465-510 |
| E8          | SCARLET     | Unknown     | LYC                        | Target      | 465-510 |
| F7          | SCARLET     | Unknown     | TUBULIN                    | Reference   | 465-510 |
| F8          | SCARLET     | Unknown     | TUBULIN                    | Reference   | 465-510 |

| Name: E9/F9 |             |             | Pairing Setting: AllToMean |             |         |
|-------------|-------------|-------------|----------------------------|-------------|---------|
| Position    | Sample Name | Sample Type | Target Name                | Target Type | Channel |
| E9          | ORANGE      | Unknown     | LYC                        | Target      | 465-510 |
| E10         | ORANGE      | Unknown     | LYC                        | Target      | 465-510 |
| F9          | ORANGE      | Unknown     | TUBULIN                    | Reference   | 465-510 |
| F10         | ORANGE      | Unknown     | TUBULIN                    | Reference   | 465-510 |

| Name: E11/F11 |             |             | Pairing Setting: AllToMean |             |         |
|---------------|-------------|-------------|----------------------------|-------------|---------|
| Position      | Sample Name | Sample Type | Target Name                | Target Type | Channel |
| E11           | YELLOW      | Unknown     | LYC                        | Target      | 465-510 |
| E12           | YELLOW      | Unknown     | LYC                        | Target      | 465-510 |
| F11           | YELLOW      | Unknown     | TUBULIN                    | Reference   | 465-510 |
| F12           | YELLOW      | Unknown     | TUBULIN                    | Reference   | 465-510 |

**Results**

| Bar Chart                           | Pairing | Sample Name | Target Name |            | Tgt Cp Mean | Ref. Cp Mean | Ratios   |      | Corr/Multi Factor | Status |
|-------------------------------------|---------|-------------|-------------|------------|-------------|--------------|----------|------|-------------------|--------|
|                                     |         |             | Targets     | References |             |              | Tgt/Ref. | Norm |                   |        |
| <input checked="" type="checkbox"/> | D7/F7   | SCARLET     | ZCD         | TUBULIN    | 20.14       | 21.57        | 2.697    |      | 1/1               |        |
| <input checked="" type="checkbox"/> | D9/F9   | ORANGE      | ZCD         | TUBULIN    | 22.71       | 22.56        | 0.9006   |      | 1/1               |        |
| <input checked="" type="checkbox"/> | D11/F11 | YELLOW      | ZCD         | TUBULIN    | 26.05       | 25.53        | 0.6977   |      | 1/1               |        |
| <input checked="" type="checkbox"/> | E7/F7   | SCARLET     | LYC         | TUBULIN    | 27.78       | 21.57        | 1.35E-2  |      | 1/1               |        |
| <input checked="" type="checkbox"/> | E9/F9   | ORANGE      | LYC         | TUBULIN    | 25.47       | 22.56        | 0.1332   |      | 1/1               |        |
| <input checked="" type="checkbox"/> | E11/F11 | YELLOW      | LYC         | TUBULIN    | 28.55       | 25.53        | 0.1234   |      | 1/1               |        |

**Relative Quantification Results**

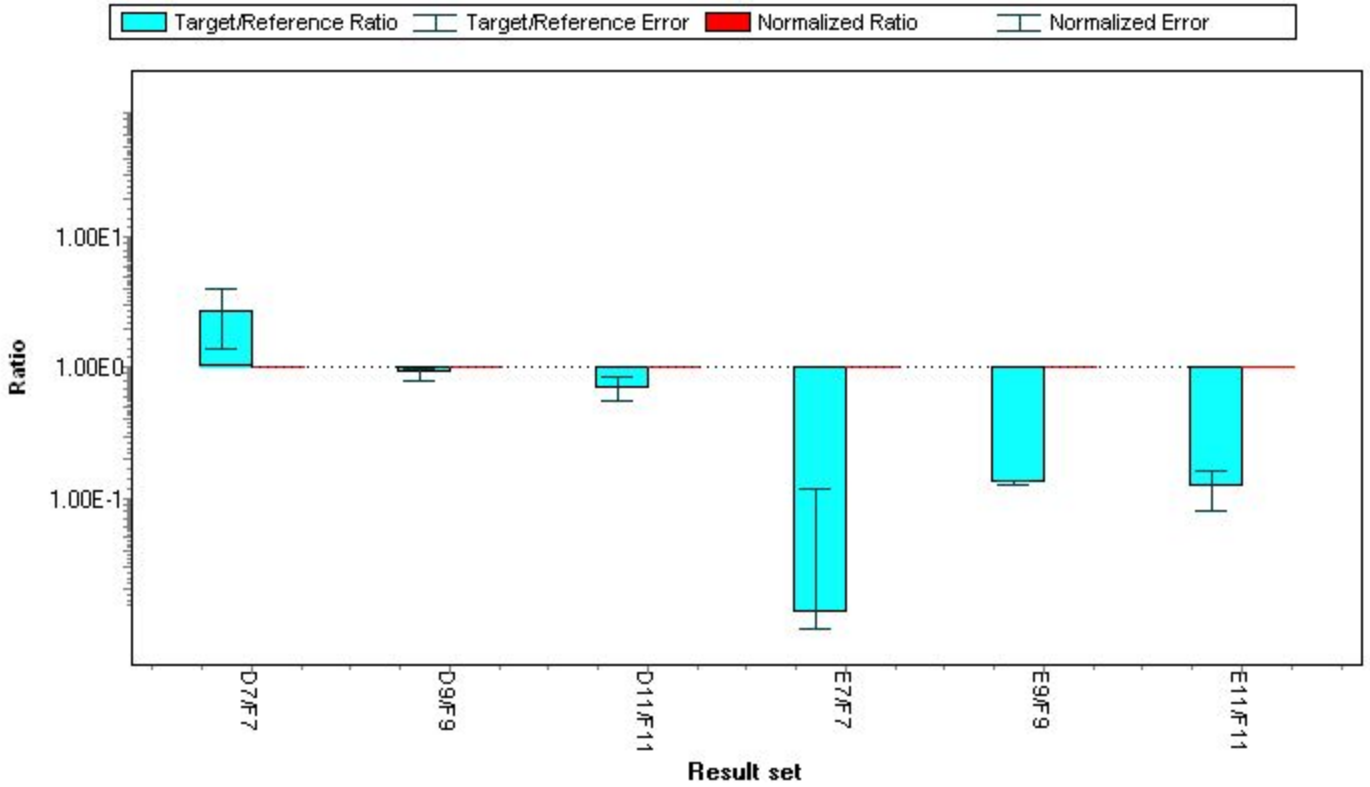

**Subordinate for ZCD\465-510\ALL TODAY (Abs Quant/2nd Derivative Max)**

**Settings**

|                    |                       |       |  |
|--------------------|-----------------------|-------|--|
| Channel            | 465-510               |       |  |
| Color Compensation | Off                   |       |  |
| Program            | PCR                   | Units |  |
| Mode               | High Confidence       |       |  |
| Subset Name        | ZCD\465-510\ALL TODAY |       |  |

**Subordinate for LYC\465-510\ALL TODAY (Abs Quant/2nd Derivative Max)**

**Settings**

|                    |                 |       |  |
|--------------------|-----------------|-------|--|
| Channel            | 465-510         |       |  |
| Color Compensation | Off             |       |  |
| Program            | PCR             | Units |  |
| Mode               | High Confidence |       |  |

|             |                       |  |  |
|-------------|-----------------------|--|--|
| Subset Name | LYC\465-510\ALL TODAY |  |  |
|-------------|-----------------------|--|--|

**Subordinate for TUBULIN\465-510\ALL TODAY (Abs Quant/2nd Derivative Max)****Settings**

|                    |                 |       |  |
|--------------------|-----------------|-------|--|
| Channel            | 465-510         |       |  |
| Color Compensation | Off             |       |  |
| Program            | PCR             | Units |  |
| Mode               | High Confidence |       |  |

|             |                           |  |  |
|-------------|---------------------------|--|--|
| Subset Name | TUBULIN\465-510\ALL TODAY |  |  |
|-------------|---------------------------|--|--|

**Advanced Relative Quantification for ZCDTUB (2) (Relative Quantification)****Target Names**

| Target ID | Filter Combination | Standards/Efficiency | Efficiency Value |
|-----------|--------------------|----------------------|------------------|
| ZCD       | 465-510            | Efficiency           | 2.00             |
| TUBULIN   | 465-510            | Efficiency           | 2.00             |

**Pairings**

| Name:    | D7/F7       |             | Pairing Setting: | AllToMean   |         |  |
|----------|-------------|-------------|------------------|-------------|---------|--|
| Position | Sample Name | Sample Type | Target Name      | Target Type | Channel |  |
| D7       | SCARLET     | Unknown     | ZCD              | Target      | 465-510 |  |
| D8       | SCARLET     | Unknown     | ZCD              | Target      | 465-510 |  |
| F7       | SCARLET     | Unknown     | TUBULIN          | Reference   | 465-510 |  |
| F8       | SCARLET     | Unknown     | TUBULIN          | Reference   | 465-510 |  |

| Name:    | D9/F9       |             | Pairing Setting: | AllToMean   |         |  |
|----------|-------------|-------------|------------------|-------------|---------|--|
| Position | Sample Name | Sample Type | Target Name      | Target Type | Channel |  |
| D9       | ORANGE      | Unknown     | ZCD              | Target      | 465-510 |  |
| D10      | ORANGE      | Unknown     | ZCD              | Target      | 465-510 |  |
| F9       | ORANGE      | Unknown     | TUBULIN          | Reference   | 465-510 |  |
| F10      | ORANGE      | Unknown     | TUBULIN          | Reference   | 465-510 |  |

| Name:    | D11/F11     |             | Pairing Setting: | AllToMean   |         |  |
|----------|-------------|-------------|------------------|-------------|---------|--|
| Position | Sample Name | Sample Type | Target Name      | Target Type | Channel |  |

**Pairings**

|     |        |         |         |           |         |
|-----|--------|---------|---------|-----------|---------|
| D11 | YELLOW | Unknown | ZCD     | Target    | 465-510 |
| D12 | YELLOW | Unknown | ZCD     | Target    | 465-510 |
| F11 | YELLOW | Unknown | TUBULIN | Reference | 465-510 |
| F12 | YELLOW | Unknown | TUBULIN | Reference | 465-510 |

**Results**

| Bar Chart                           | Pairing | Sample Name | Target Name |            | Tgt Cp | Ref. Cp | Ratios   |      | Corr/Multi Factor | Status |
|-------------------------------------|---------|-------------|-------------|------------|--------|---------|----------|------|-------------------|--------|
|                                     |         |             | Targets     | References | Mean   | Mean    | Tgt/Ref. | Norm |                   |        |
| <input checked="" type="checkbox"/> | D7/F7   | SCARLET     | ZCD         | TUBULIN    | 20.14  | 21.57   | 2.697    |      | 1/1               |        |
| <input checked="" type="checkbox"/> | D9/F9   | ORANGE      | ZCD         | TUBULIN    | 22.71  | 22.56   | 0.9006   |      | 1/1               |        |
| <input checked="" type="checkbox"/> | D11/F11 | YELLOW      | ZCD         | TUBULIN    | 26.05  | 25.53   | 0.6977   |      | 1/1               |        |

**Relative Quantification Results**

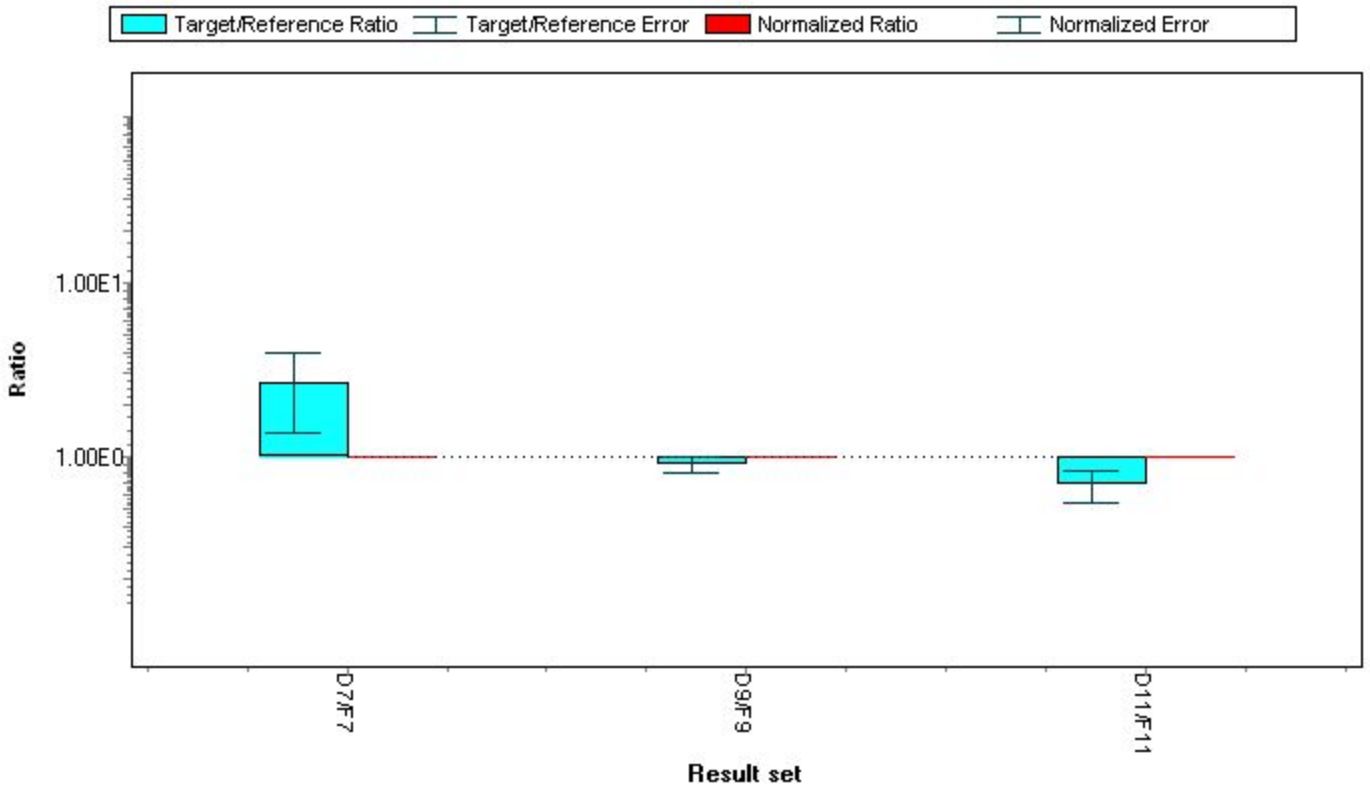

**Subordinate for ZCD\465-510\ZCDTUB (Abs Quant/2nd Derivative Max)**

**Settings**

|                    |                 |       |  |
|--------------------|-----------------|-------|--|
| Channel            | 465-510         |       |  |
| Color Compensation | Off             |       |  |
| Program            | PCR             | Units |  |
| Mode               | High Confidence |       |  |

|             |                    |
|-------------|--------------------|
| Subset Name | ZCD\465-510\ZCDTUB |
|-------------|--------------------|

**Subordinate for TUBULIN\465-510\ZCDTUB (Abs Quant/2nd Derivative Max)**

---

**Settings**

|                    |                 |       |  |
|--------------------|-----------------|-------|--|
| Channel            | 465-510         |       |  |
| Color Compensation | Off             |       |  |
| Program            | PCR             | Units |  |
| Mode               | High Confidence |       |  |

|             |                       |  |  |
|-------------|-----------------------|--|--|
| Subset Name | TUBULIN465-510\ZCDTUB |  |  |
|-------------|-----------------------|--|--|
